# Supplementary material
Source: PubMed Central journal article supplement (PMC5004972)
Supplement: JCI84939.sd.pdf [file JCI84939.sd.pdf]

Supplemental Figure 1

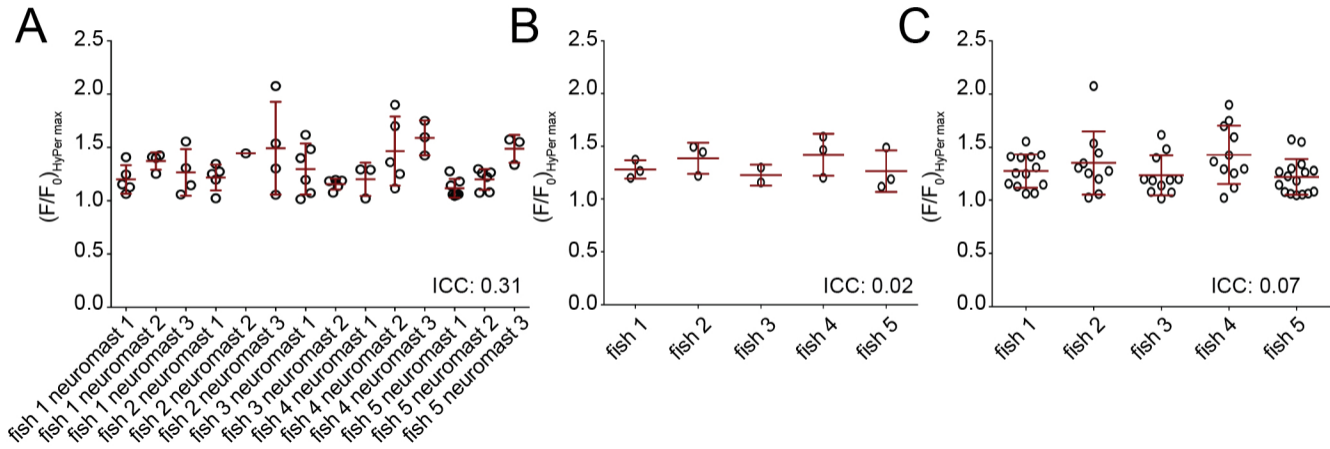

# Supplemental Figure 2

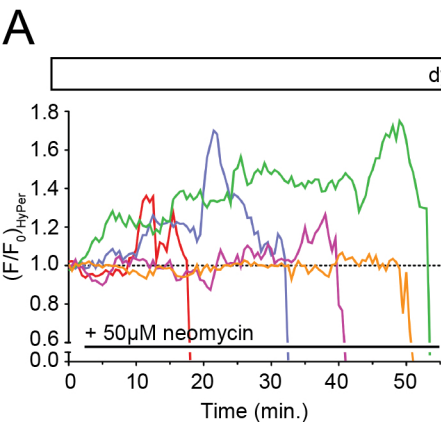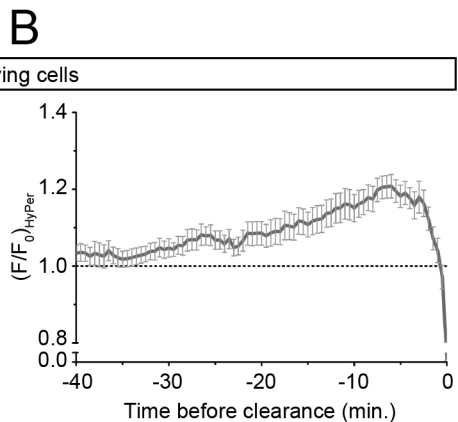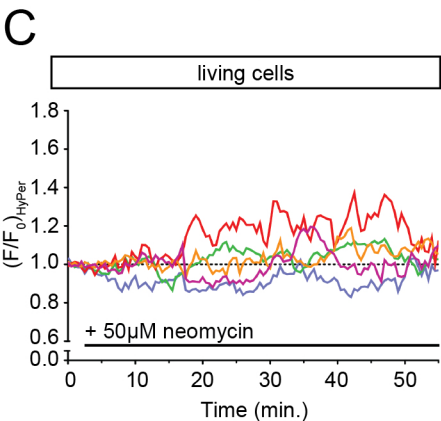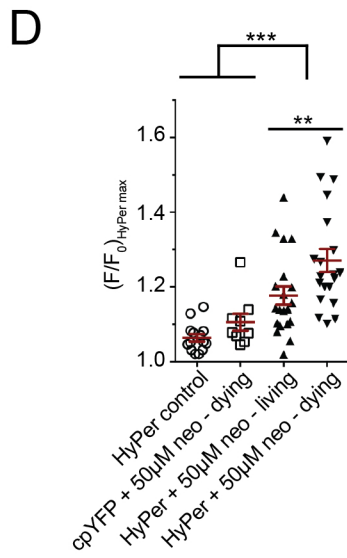

Supplemental Figure 3

A

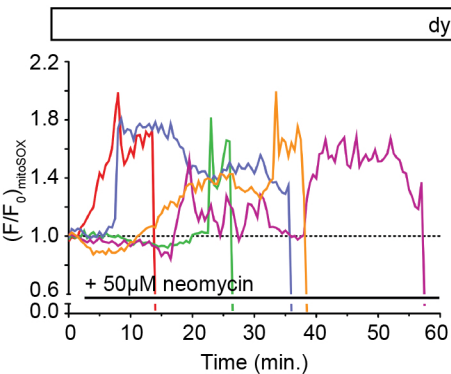

B

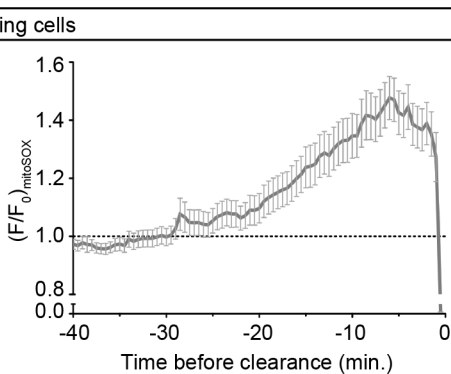

C

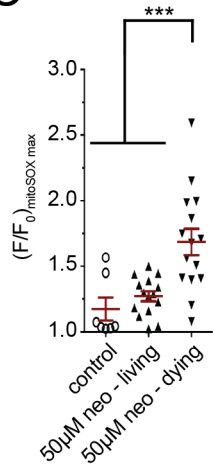

|                          | <u>Sensor Name</u> | <u>Detects</u>                                               | <u>Properties</u> | <u>References</u> | <u>Ex (nm)</u> | <u>Em (nm)</u> |
|--------------------------|--------------------|--------------------------------------------------------------|-------------------|-------------------|----------------|----------------|
| <b><u>Biosensors</u></b> | HyPer              | cytoplasmic hydrogen peroxide                                | reversible        | 34                | 420*/500       | 516            |
|                          | mitoRGECO          | mitochondrial calcium                                        | reversible        | 40                | 577            | 600            |
| <b><u>Dyes</u></b>       | cellROX            | oxidative stress within nucleus, cytoplasm, and mitochondria | irreversible      |                   | 485            | 520            |
|                          | mitoSOX            | mitochondrial oxidation                                      | irreversible      | 37                | 510            | 580            |
|                          | TMRE               | mitochondrial transmembrane potential                        | reversible        | 35                | 549            | 574            |

\* we did not use the 420nm excitation wavelength as zebrafish are prone to substantial autofluorescence at this wavelength

## Supplemental Table 1
